# Supplementary material
Source: PubMed Central journal article supplement (PMC3436978)
Supplement: NIHMS386637-supplement-01.pdf [file NIHMS386637-supplement-01.pdf]

**Supplemental Table 1.**Primer pairs used to clone *cas* conserved sequence clusters (CSCs)

| <b>CSC</b>    | <b>5' primer</b>                  | <b>3' primer</b>                |
|---------------|-----------------------------------|---------------------------------|
| <i>cas-1</i>  | AGATCTCCCATAAAGGGCAAAGGTGCACCC    | GCTAGCGGATTTACGTTTCGCTTTTCTGCC  |
| <i>cas-2</i>  | CAATAATTCCCACATTATGCGAC           | GCTAGCGTTCGACGAAGATGCTGATACC    |
| <i>cas-3</i>  | AGATCTCAGCAATGGCATTGCATAAAATTTTCG | GCTAGCCTAGCCTCATTATCCAACC       |
| <i>cas-4</i>  | AGATCTGGCGCAGAGATGAGTTGCG         | GCTAGCTCGGTTTGTCCGACTTCCGG      |
| <i>cas-5</i>  | AGATCTGCTGCTCAAGGACCGCCC          | GCTAGCATGAAACCATCCCATCAGCGTG    |
| <i>cas-5a</i> | AGATCTGCTGCTCAAGGACCGCCC          | GCTAGCTTCCAAGTTTCGTTTTCCGCAAT   |
| <i>cas-5b</i> | AGATCTGAAAGTCCTTGGAACCGAACCC      | GCTAGCTCCAATCAACTGAGCTGGC       |
| <i>cas-5c</i> | AGATCTTTGTTAAGTGTGTGTTGCTGGC      | GCTAGCATGAAACCATCCCATCAGCGTG    |
| <i>cas-6</i>  | AGATCTTGCAGATACCGGAGTCGAGATG      | GCTAGCTAAGACCTTGACGCTTCCCATG,   |
| <i>cas-7</i>  | AGATCTCAGTTACCAAAGCGGAAGCGTGCC    | GCTAGCATCGGCAATCTTATTCGCC       |
| <i>cas-7a</i> | AGATCTAAGTGTGGTCATTTCGTAGCC       | GCTAGCAAATCAATTAGCCAACCTGAAGGG  |
| <i>cas-7b</i> | AGATCTCAGCAACAACACTTAACAAAGGC     | GCTAGCCCTTTTCCTTACATCTCTATGC    |
| <i>cas-8</i>  | AGATCTAATACACGCTCCTCTTTCGC        | GCTAGCCGCGGATATATTAGCACAGC      |
| <i>cas-9</i>  | TGATCAAGTGTGCCACAAAAATGTCCAACC    | GCTAGCGTGGTTGACTCCAGCGGATGG     |
| <i>cas-10</i> | AGATCTCCGACAGCCTAGACTACCCAGC      | GCTAGCATCTGTGAGATCCCCAGC        |
| <i>cas-11</i> | AGATCTCCCACTGCAGTATACGCCCG        | GCTAGCGGCTTCCGACTGCTGAGCGTCG    |
| <i>cas-12</i> | AGATCTGGAAGGATGCGTGTCTTAGGG       | GCTAGCGTGTTTAAATAATAAGCTCTGAGGC |
